# Supplementary material for: Functional Characterization of the Promiscuous Prenyltransferase Responsible for Furaquinocin Biosynthesis: IDENTIFICATION OF A PHYSIOLOGICAL POLYKETIDE SUBSTRATE AND ITS PRENYLATED REACTION PRODUCTS
Source: PubMed Central journal article supplement — J Biol Chem. 2010 Oct 11;285(51):39663–71. doi: 10.1074/jbc.M110.153957 (PMC3000947; doi:10.1074/jbc.m110.153957), 2010-10-11
Supplement: supp_M110.153957_jbc.M110.153957-1.pdf [file supp_M110.153957_jbc.M110.153957-1.pdf]

## Supplementary Information

### FUNCTIONAL CHARACTERIZATION OF THE PROMISCUOUS PRENYLTRANSFERASE RESPONSIBLE FOR FURAQUINOCIN BIOSYNTHESIS: IDENTIFICATION OF A PHYSIOLOGICAL POLYKETIDE SUBSTRATE AND ITS PRENYLATED REACTION PRODUCTS

Takuto Kumano (熊野 匠人), Takeo Tomita (富田 武郎), Makoto Nishiyama (西山 真), and Tomohisa Kuzuyama (葛山 智久)<sup>1</sup>

*From Biotechnology Research Center, The University of Tokyo, 1-1-1 Yayoi, Bunkyo-ku, Tokyo 113-8657, Japan*

Running head: Prenyltransferase in furaquinocin biosynthesis

<sup>1</sup>To whom correspondence should be addressed: Fax: +81-3-5841-8030  
E-mail: [utkuz@mail.ecc.u-tokyo.ac.jp](mailto:utkuz@mail.ecc.u-tokyo.ac.jp)

#### <sup>1</sup>H-, <sup>13</sup>C-NMR and HR-MS data of the prenylated products.

The structures were analyzed by their mass spectral data [HRMS (ESI<sup>-</sup>); JEOL JMS-T100LC] and nuclear magnetic resonance (NMR) spectral data (600 MHz, JEOL ECA-600).

**(E)-3-(3,7-dimethylocta-2,6-dienyl)-2,5,7-trihydroxynaphthalene-1,4-dione 5** was converted from flaviolin **1** by recombinant Fur7.

HRMS (ESI<sup>-</sup>) calcd. for C<sub>20</sub>H<sub>21</sub>O<sub>5</sub> [M-H]<sup>-</sup>, 341.13890; found 341.13531. <sup>1</sup>H NMR (DMSO-*d*<sub>6</sub>) δ: 1.47 (s, 3H, Me-10'), 1.53 (s, 3H, Me-8'), 1.64 (s, 3H, Me-9'), 1.85 (m, 2H, H-4'), 1.95 (m, 2H, H-5'), 3.01 (d, *J* = 6.8 Hz, 2H, H-1'), 4.98 (t, *J* = 6.8 Hz, 1H, H-6'), 5.07 (t, *J* = 6.8 Hz, 1H, H-2'), 6.41 (s, 1H, H-6), 6.81 (s, 1H, H-8), 13.60 (s, 1H, C-5-OH), <sup>13</sup>C NMR (DMSO-*d*<sub>6</sub>) δ: 16.6 (C-9'), 18.1 (C-10'), 22.0 (C-1'), 26.1 (C-8'), 26.8 (C-5'), 39.9 (C-4'), 107.6 (C-8), 108.7 (C-4a), 108.7 (C-6), 120.1 (C-3), 122.8 (C-2'), 124.8 (C-6'), 131.3 (C-7'), 132.4 (C-8a), 134.7 (C-3'), 162.2 (C-2), 162.9 (C-7), 163.3 (C-5), 183.2 (C-1), 189.9 (C-4).

**3-(3,7-dimethylocta-1,6-dien-3-yl)-2,5,7-trihydroxynaphthalene-1,4-dione 6** was converted from **1** by recombinant Fur7.

HRMS (ESI<sup>-</sup>) calcd. for C<sub>20</sub>H<sub>21</sub>O<sub>5</sub> [M-H]<sup>-</sup>, 341.13890; found 341.14055. <sup>1</sup>H NMR (DMSO-*d*<sub>6</sub>) δ: 1.41 (s, 3H, H-7'), 1.44 (s, 3H, H-10'), 1.49 (s, 3H, H-7'), 1.72 (m, 1H, H-2'), 1.83 (m, 2H, H-3'), 1.99 (m, 1H, H-2'), 4.76 (d, *J* = 10.3 Hz, 1H, H-9'), 4.82 (d, *J* = 18.0 Hz, 1H, H-9'), 4.98 (t, *J* = 6.8 Hz, 1H, H-4'), 6.22 (dd, *J* = 10.3, 18.0 Hz, 1H, H-8'), 6.45 (s, 1H, H-6), 6.84 (s, 1H, H-8), 13.18 (s, 1H, C-5-OH), <sup>13</sup>C NMR (DMSO-*d*<sub>6</sub>) δ: 17.9 (C-10'), 24.1 (C-5'), 25.9 (C-8'), 26.5 (C-9'), 40.8 (C-4'), 44.2, (C-3'), 107.0 (C-8), 108.7 (C-6), 109.0 (C-4a), 109.2 (C-1'), 124.0 (C-3), 125.6 (C-6'), 130.8 (C-7'), 131.7 (C-8a), 149.2 (C-2'), 159.8 (C-2), 163.0 (C-7), 163.4 (C-5), 182.3 (C-1), 190.0 (C-4).

**2,5,7-trihydroxy-3-(3-methylbut-2-en-1-yl)naphthalene-1,4-dione** was converted from **1** by recombinant Fur7.

<sup>1</sup>H NMR (CD<sub>3</sub>OD) δ: 1.64 (s, 3H, Me-5'), 1.74 (s, 3H, Me-4'), 3.17 (d, *J* = 6.8 Hz, 2H, H-1'), 5.14 (m, 1H, H-2'), 6.46 (s, 1H, H-6), 6.96 (s, 1H, H-8)

**2,5,7-trihydroxy-3-(2-methylbut-3-en-2-yl)naphthalene-1,4-dione** was converted from **1** by recombinant Fur7.

<sup>1</sup>H NMR (CD<sub>3</sub>OD) δ: 1.52 (s, 6H, Me-1', Me-5'), 4.82 (d, *J* = 10.9 Hz, 1H, H-4'), 4.90 (d, 16.5 Hz, 1H, H-4'), 6.24 (dd, *J* = 10.9, 16.5 Hz, 2H, H-3'), 6.47 (s, 1H, H-6), 6.96 (s, 1H, H-8)

**1-O-geranyl-1,3-DHN** was converted from 1,3-DHN by recombinant Fur7.

HRMS (ESI<sup>-</sup>) calcd. for C<sub>20</sub>H<sub>23</sub>O<sub>2</sub> [M-H]<sup>-</sup>, 295.16980; found 295.17000. <sup>1</sup>H NMR (CD<sub>3</sub>OD) δ: 1.59 (s, 3H, Me-10'), 1.63 (s, 3H, Me-8'), 1.77 (s, 3H, Me-9'), 2.03 (m, 2H, H-4'), 2.10 (m, 2H, H-5'), 4.67 (d, *J*=6.9 Hz, 2H, H-1'), 5.10 (m, 1H, H-2'), 5.55 (m, 1H, H-6'), 6.47 (s, 1H, H-2), 6.65 (s, 1H, H-4), 7.16 (t, *J*=7.6 Hz, 1H, H-7), 7.31 (t, *J*=7.6 Hz, 1H, H-6), 7.52 (d, *J*=8.3 Hz, 1H, H-5), 8.01 (d, *J*=8.3 Hz, 1H, H-8)

**1-geranyl-2,7-DHN** was converted from 2,7-DHN by recombinant Fur7.

HRMS (ESI<sup>-</sup>) calcd. for C<sub>20</sub>H<sub>23</sub>O<sub>2</sub> [M-H]<sup>-</sup>, 295.16980; found 295.16599. <sup>1</sup>H NMR (CD<sub>3</sub>OD) δ: 1.50 (s, 3H, Me-10), 1.53 (s, 3H, Me-8'), 1.85 (s, 3H, Me-9'), 1.95 (m, 2H, H-4'), 2.03 (m, 2H, H-5'), 3.62 (d, *J* = 6.2 Hz, 2H, H-1'), 5.01 (m, 1H, H-6'), 5.15 (m, 1H, H-2'), 6.81 (d, *J* = 8.9 Hz, 1H, H-6), 6.86 (d, *J* = 8.9 Hz, 1H, H-3), 7.10 (s, 1H, H-8), 7.42 (d, *J* = 8.9 Hz, 1H, H-5), 7.55 (d, *J* = 8.9 Hz, 1H, H-4)

**2-geranyl-resveratrol** was converted from resveratrol by recombinant Fur7.

<sup>1</sup>H NMR (DMSO-*d*<sub>6</sub>) δ: 1.40 (s, 3H, Me-10''), 1.46 (s, 3H, Me-8''), 1.73 (s, 3H, Me-9''), 1.84 (m, 2H, H-4''), 1.91 (m, 2H, H-5''), 3.22 (d, *J* = 6.2 Hz, 2H, H-1''), 4.91 (m, 2H, H-2'', H-6''), 6.16 (s, 1H, H-4), 6.43 (s, 2H, H-6), 6.70 (d, *J* = 8.3 Hz, 2H, H-3', H-5'), 6.75 (d, *J* = 15.8 Hz, 1H, H-β), 6.96 (d, *J* = 15.8 Hz, 1H, H-α), 7.28 (d, *J* = 8.3 Hz, 2H, H-2', H-6')

## Legends for Supplementary Figure

**SUPPLEMENTAL FIGURE S1. Michaelis-Menten plot and Lineweaver-Burk plot of Fur7 reaction with 2 mM of GPP and varied [Fur-P1].**

Fixed concentration of GPP (2 mM) and various concentration of Fur-P1 (0.03 – 0.7 mM). Values are expressed as the means ± S.D. of three independent experiments.

**SUPPLEMENTAL FIGURE S2. Michaelis-Menten plot and Lineweaver-Burk plot of Fur7 reaction with 0.5 mM of Fur-P1 and varied [GPP].**

Fixed concentration of Fur-P1 (0.5 mM) and various concentration of GPP (0.05 – 0.5 mM). Values are expressed as the means ± S.D. of three independent experiments.

**SUPPLEMENTAL FIGURE S3. Michaelis-Menten plot and Lineweaver-Burk plot of Fur7 reaction with 2 mM of GPP and varied [flaviolin].**

Fixed concentration of GPP (2 mM) and various concentration of flaviolin (0.02 – 1.0 mM). Values are expressed as the means ± S.D. of three independent experiments.

**SUPPLEMENTAL FIGURE S4. Michaelis-Menten plot and Lineweaver-Burk plot of Fur7 reaction with 0.5 mM of flaviolin and varied [GPP].**

Fixed concentration of flaviolin (0.5 mM) and various concentration of GPP (0.05 – 1.0 mM). Values are expressed as the means ± S.D. of three independent experiments.

**SUPPLEMENTAL FIGURE S5. Michaelis-Menten plot and Lineweaver-Burk plot of Fur7 reaction with 4 mM of DMAPP and varied [flaviolin].**

Fixed concentration of DMAPP (4 mM) and various concentration of flaviolin (0.1 – 5.0 mM). Values are expressed as the means ± S.D. of three independent experiments.

**SUPPLEMENTAL FIGURE S6. Michaelis-Menten plot and Lineweaver-Burk plot of Fur7 reaction with 2 mM of flaviolin and varied [DMAPP].**

Fixed concentration of flaviolin (2 mM) and various concentration of DMAPP (0.1 – 5.0 mM). Values are expressed as the means  $\pm$  S.D. of three independent experiments.

**SUPPLEMENTAL FIGURE S7. Michaelis-Menten plot and Lineweaver-Burk plot of Fur7 reaction with 2 mM of GPP and varied [1,3-DHN].**

Fixed concentration of GPP (2 mM) and various concentration of 1,3-DHN (0.1 – 5.0 mM). Values are expressed as the means  $\pm$  S.D. of three independent experiments.

**SUPPLEMENTAL FIGURE S8. Michaelis-Menten plot and Lineweaver-Burk plot of Fur7 reaction with 5 mM of 1,3-DHN and varied [GPP].**

Fixed concentration of 1,3-DHN (5 mM) and various concentration of GPP (0.05 – 1.0 mM). Values are expressed as the means  $\pm$  S.D. of three independent experiments.

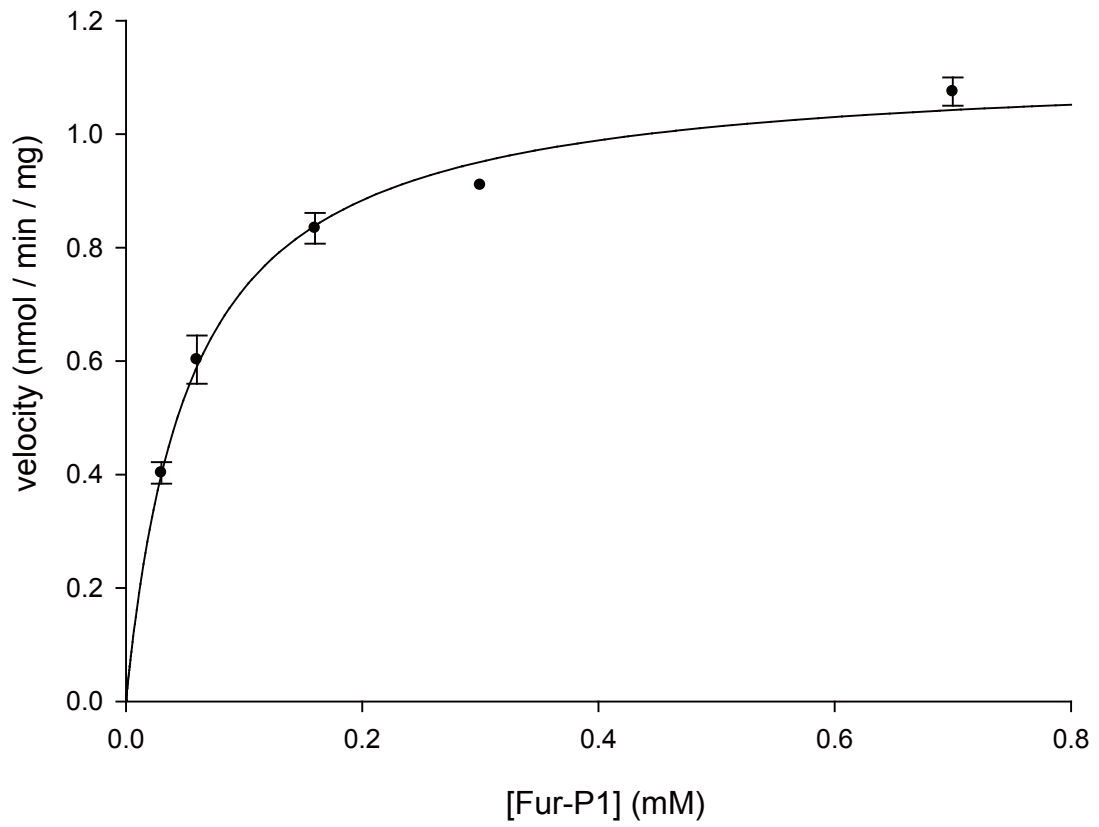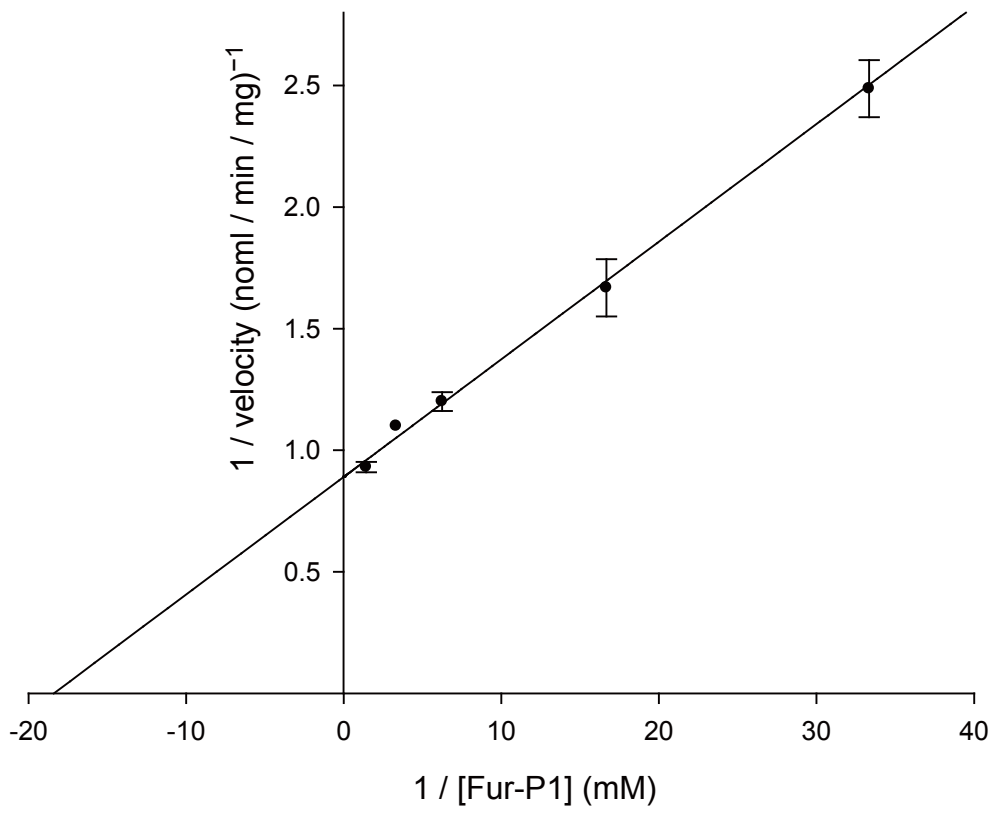

Fig. S1

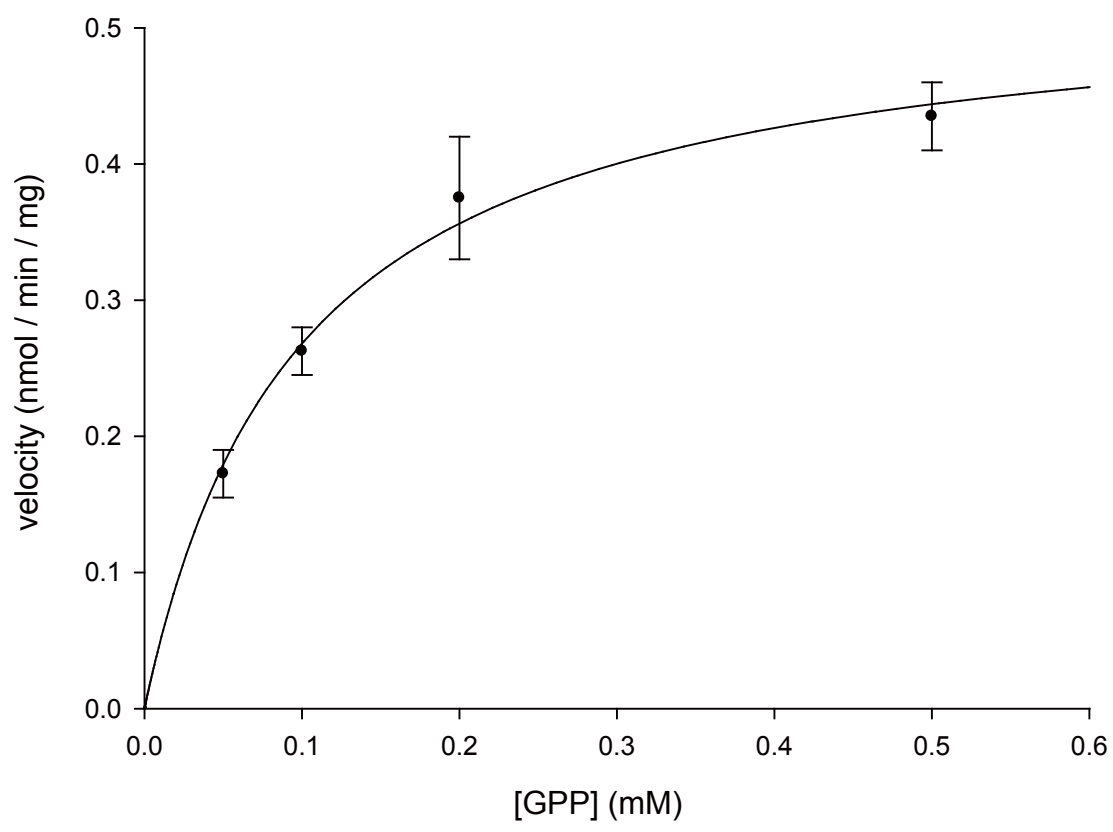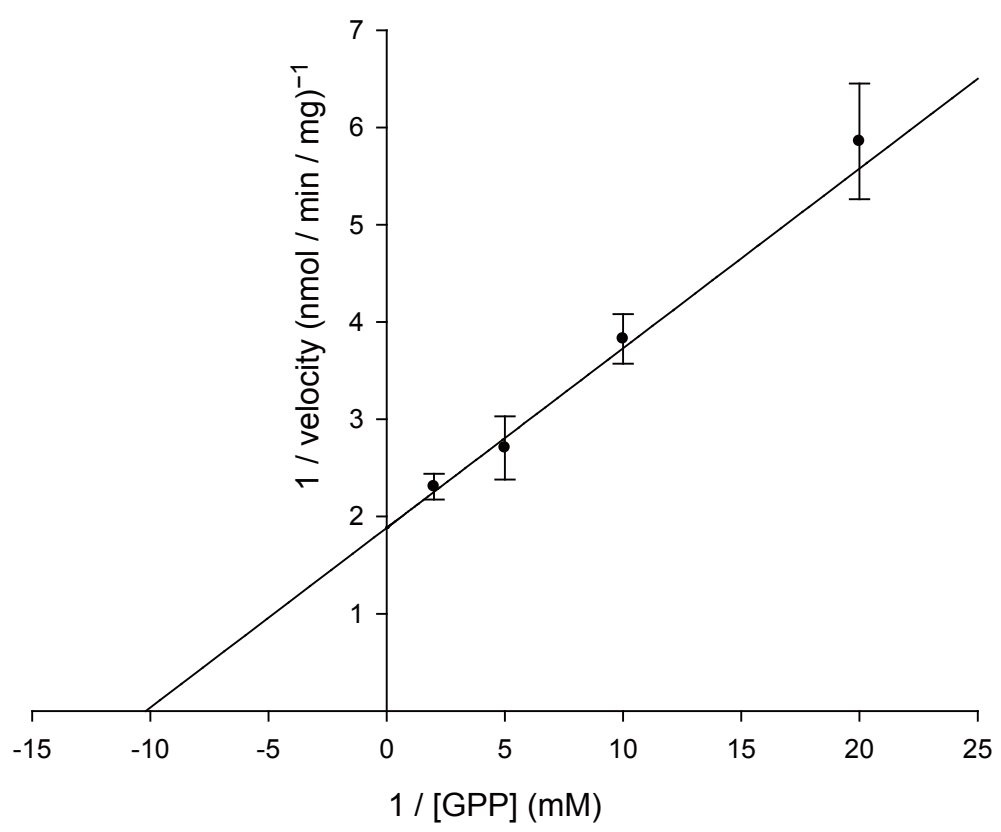

Fig. S2

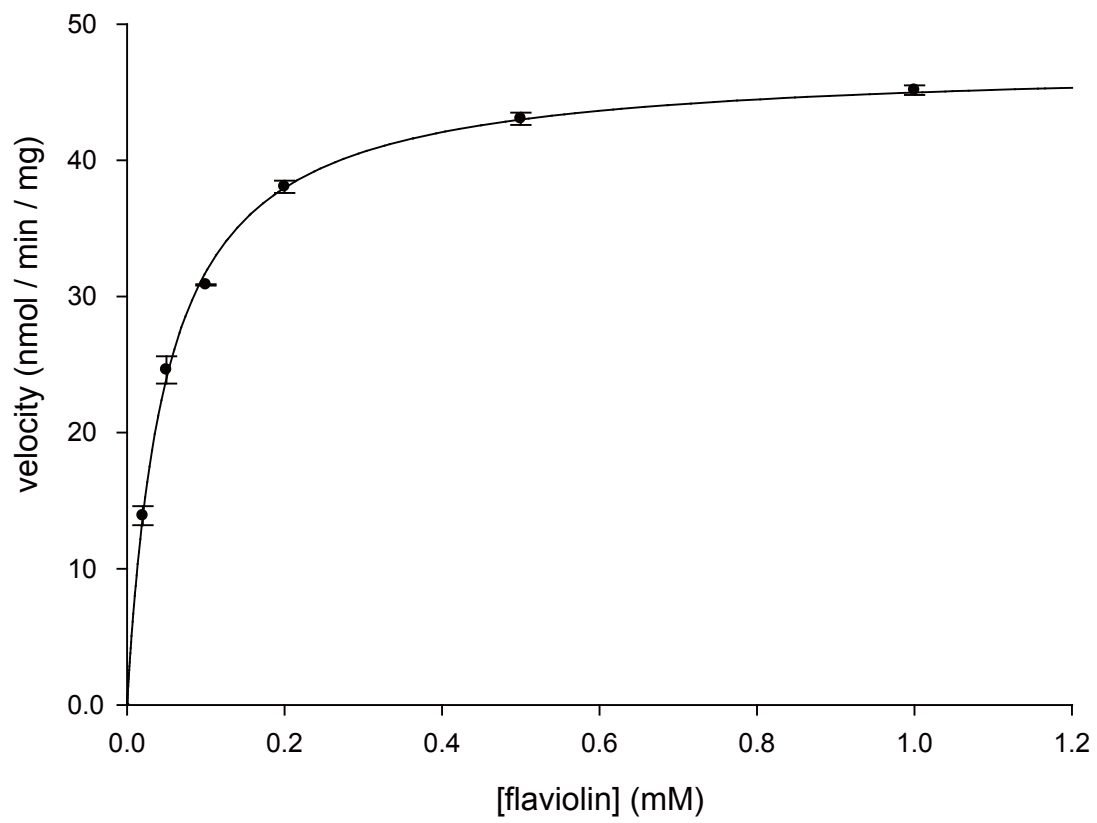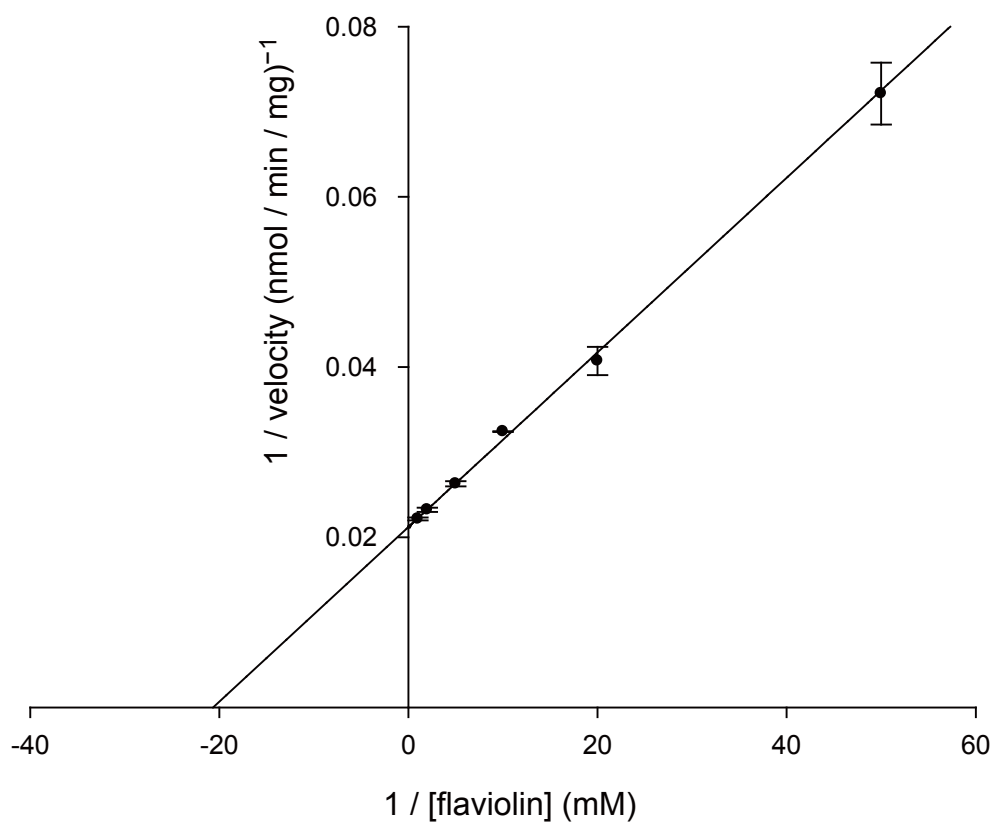

Fig. S3

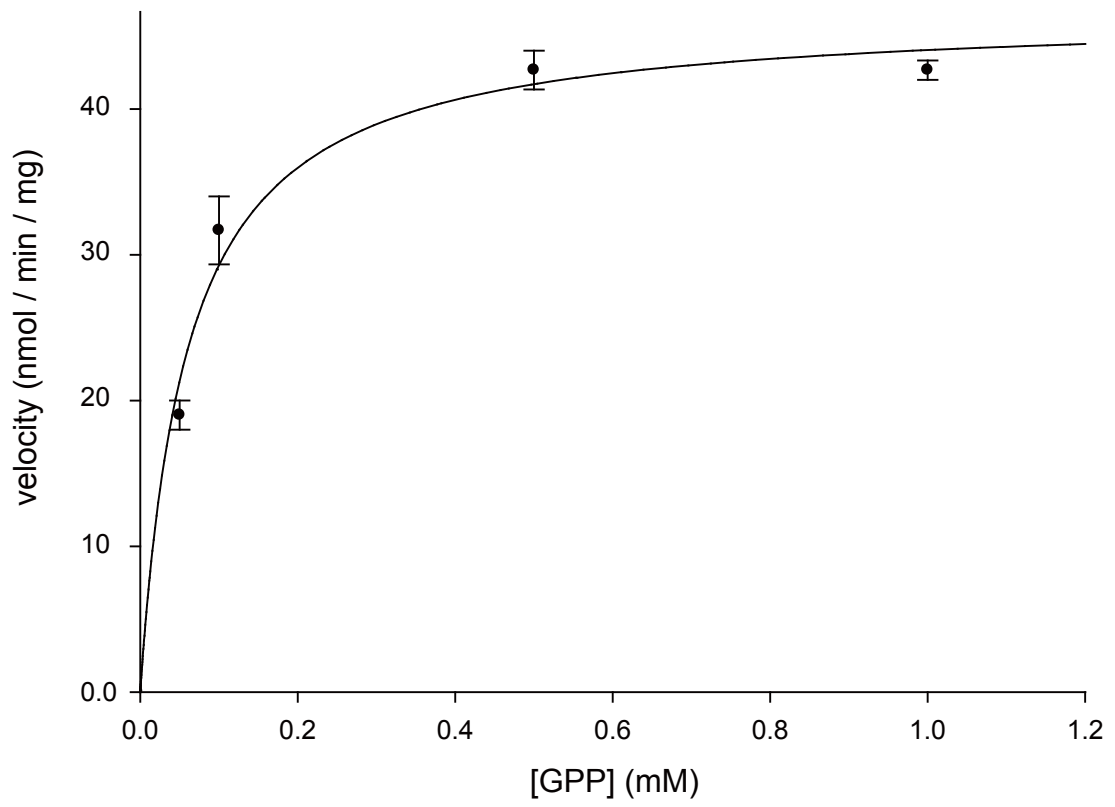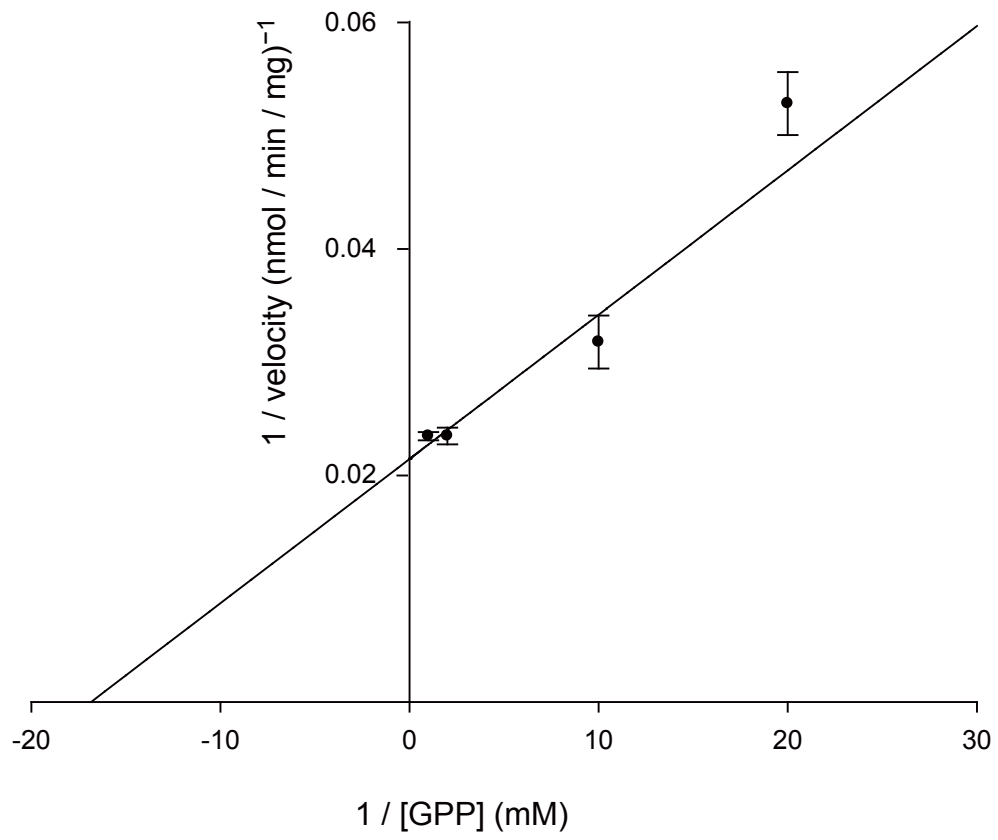

Fig. S4

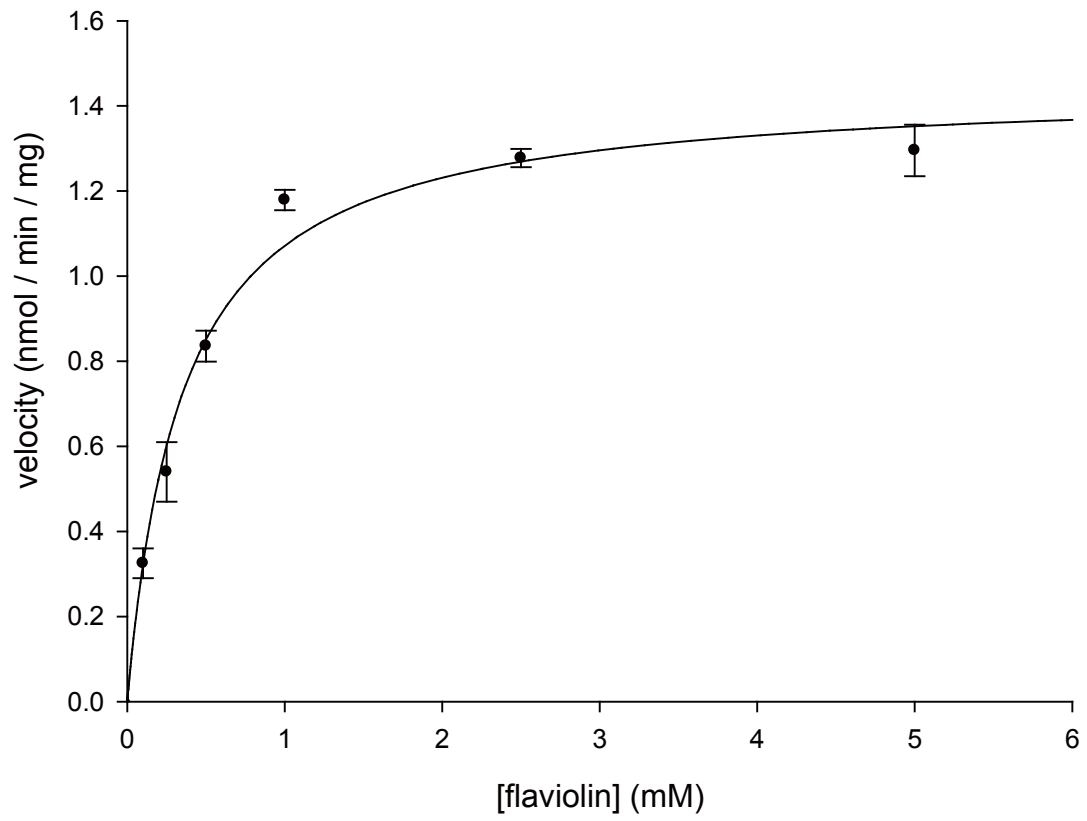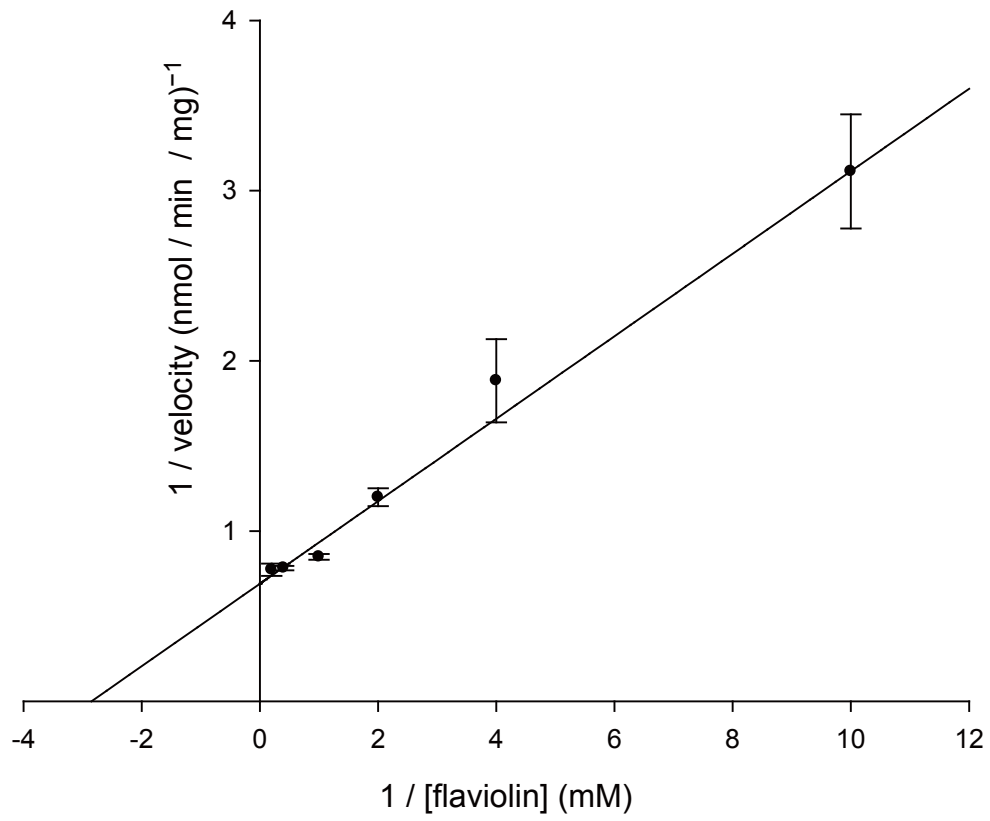

Fig. S5



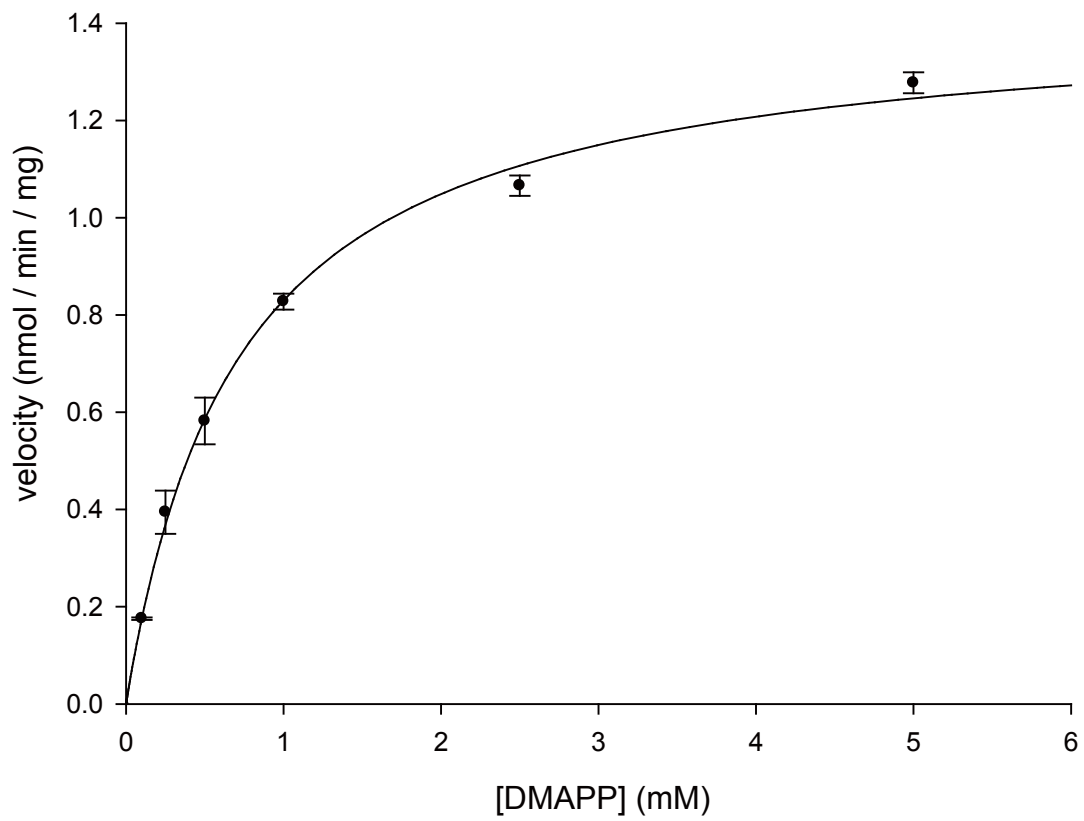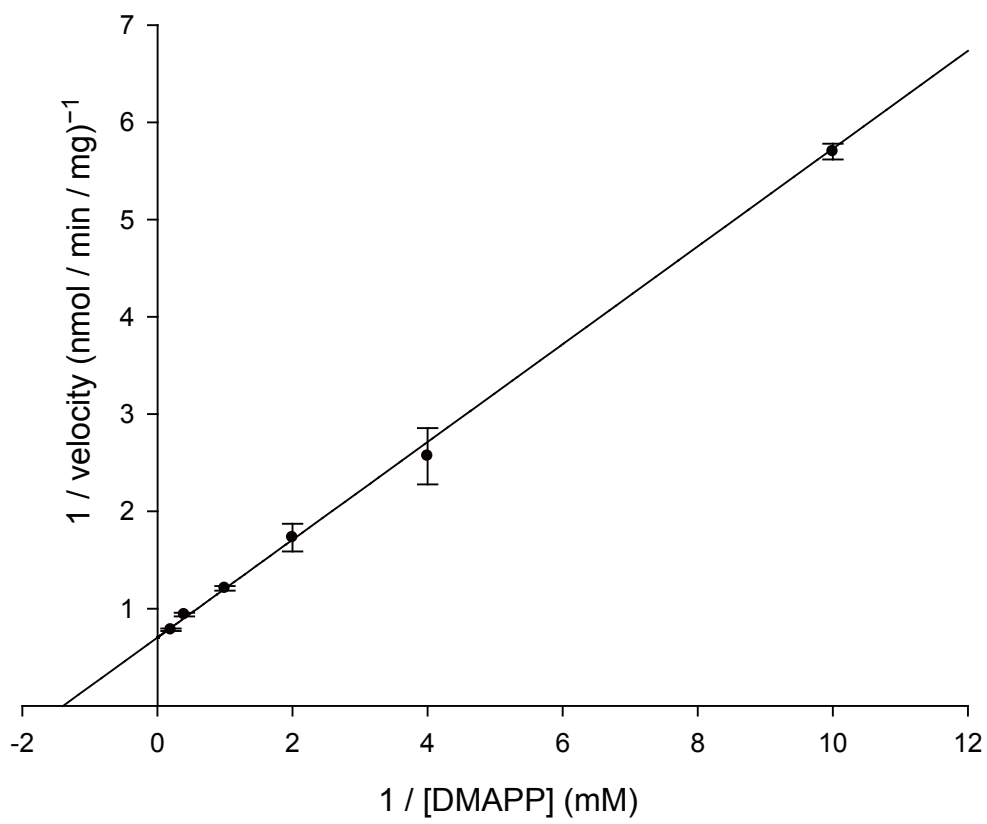

Fig. S6

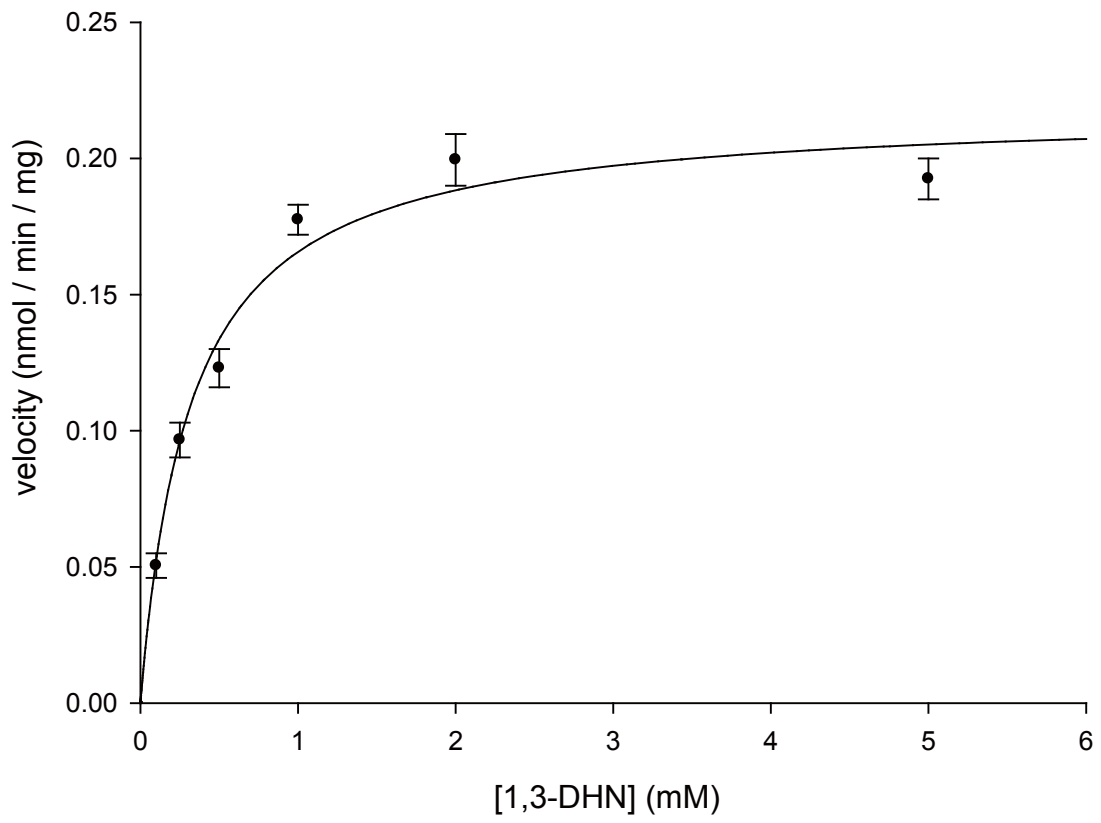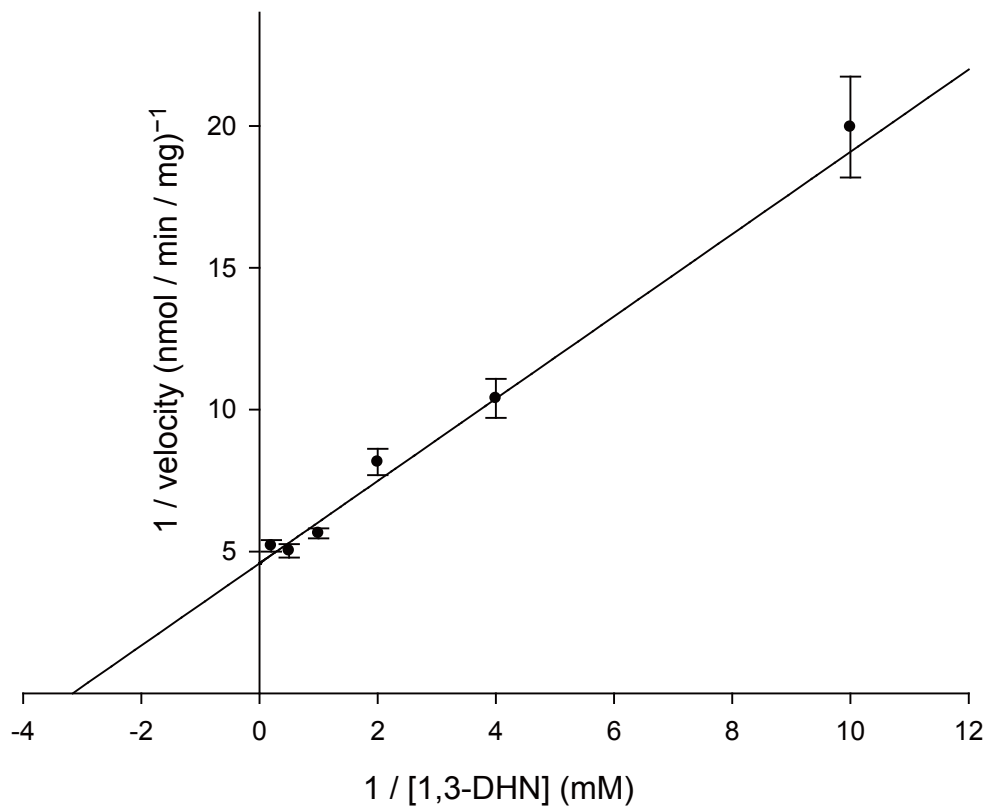

Fig. S7

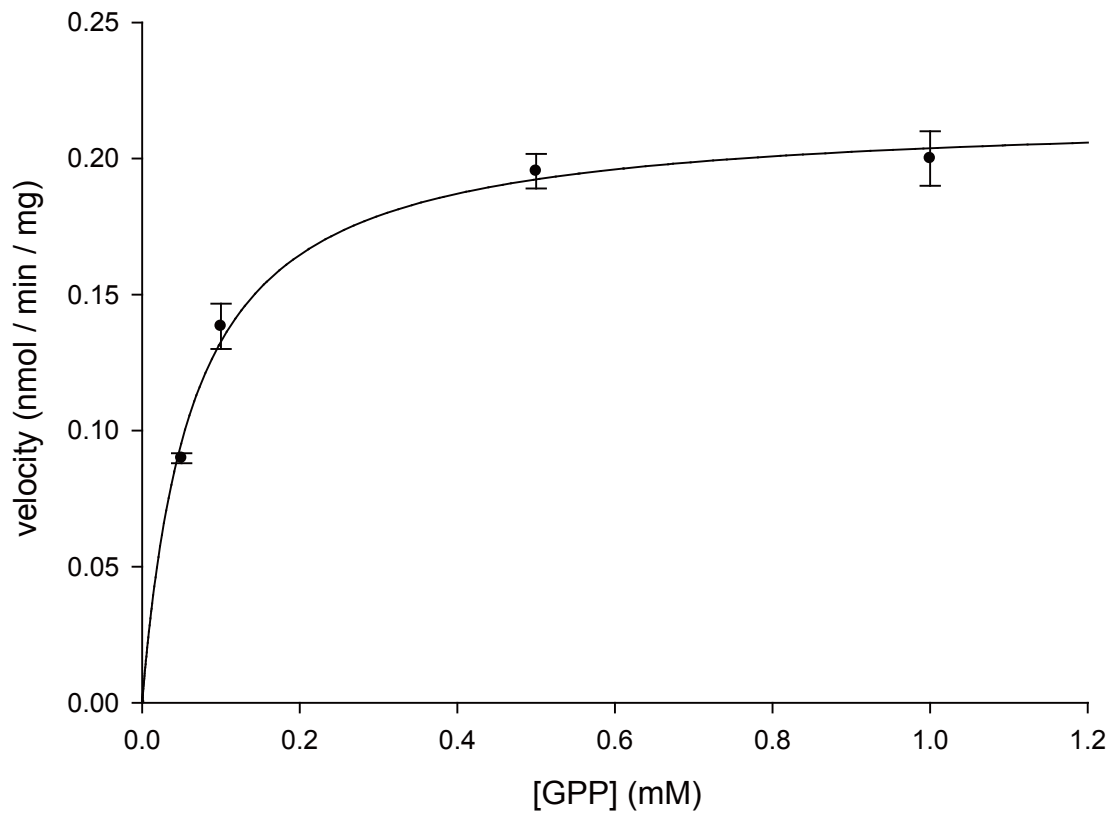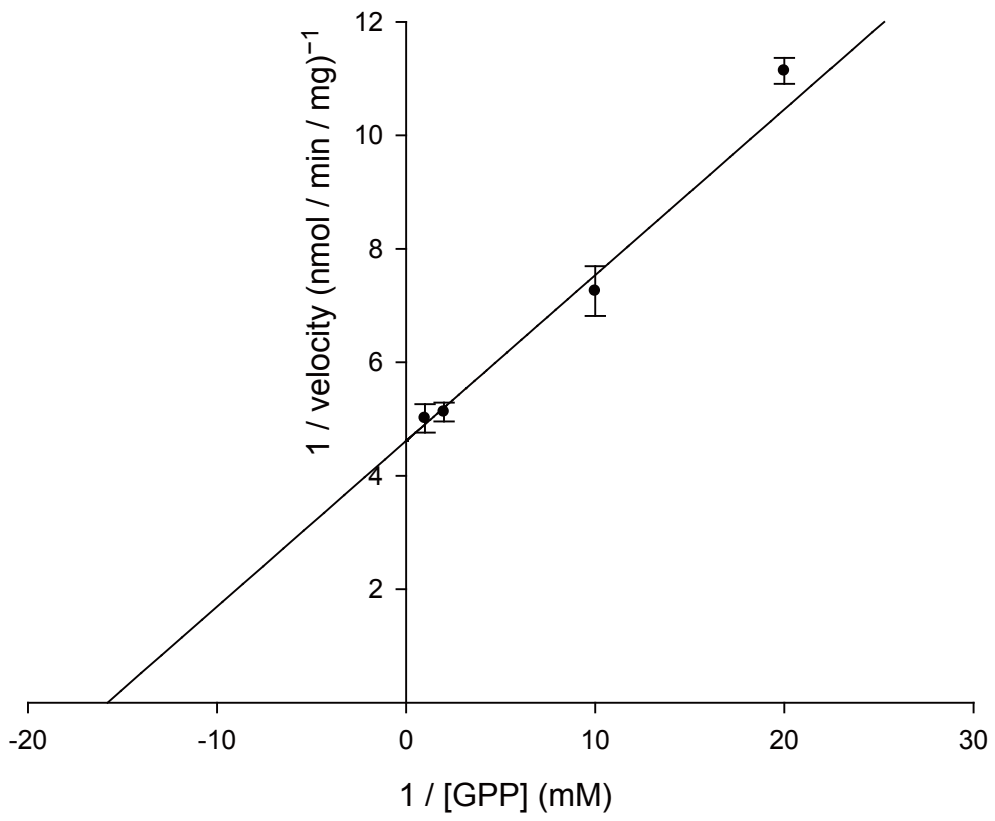

Fig. S8
